# Supplementary material for: Regional Differences in Self-Reported Health, Physical Activity and Physical Fitness of Urban Senior Citizens in Austria
Source: MDPI journal article supplement (doi:10.3390/healthcare11101514), 2023-05-22
Supplement: s1 [file s1]

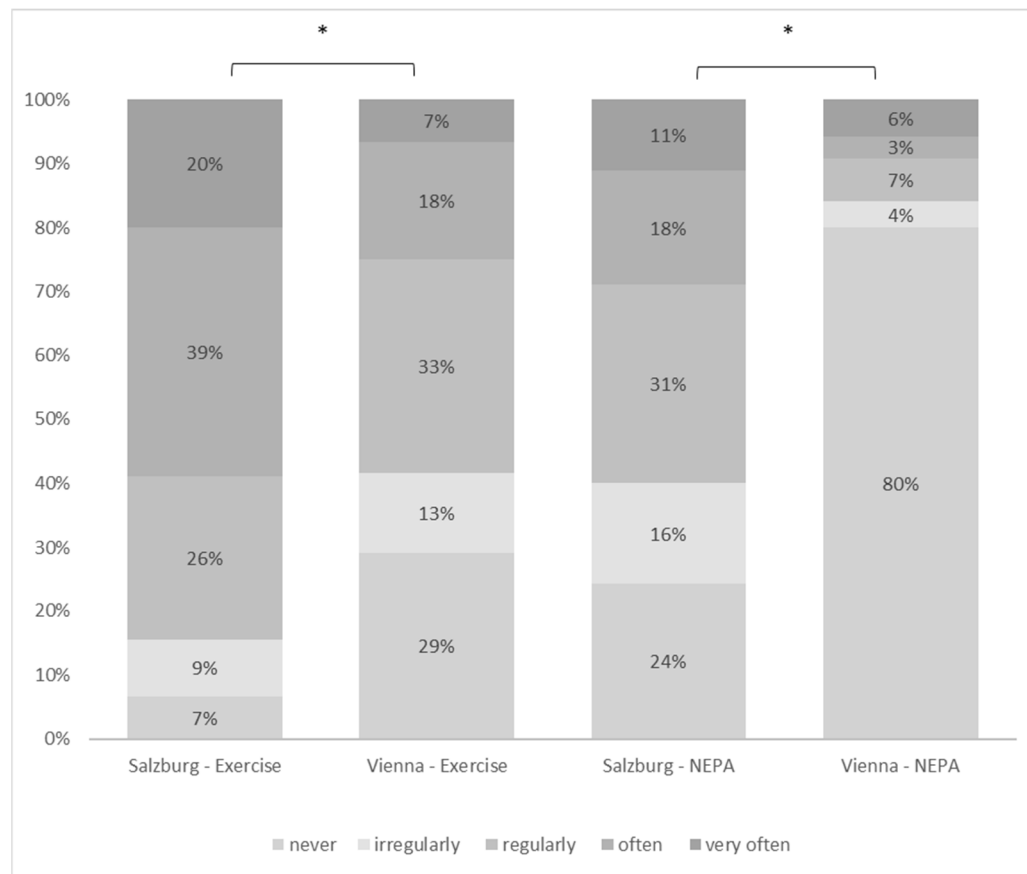

**Figure S1.** Differences in load regarding the frequency of exercise, and NEPA by region. Comparison of answers regarding frequency of exercise (= planned and structured physical activity to maintain or improve in physical fitness and/or sport) and NEPA (= non-exercise physical activity). Answer categories for frequency: never, seldom (1-2 times per month), regularly (1-2 times per week), often (3-5 times per week), very often (5-7 times per week). Salzburg n=90, Vienna n=120. \* =  $p < 0.05$ .

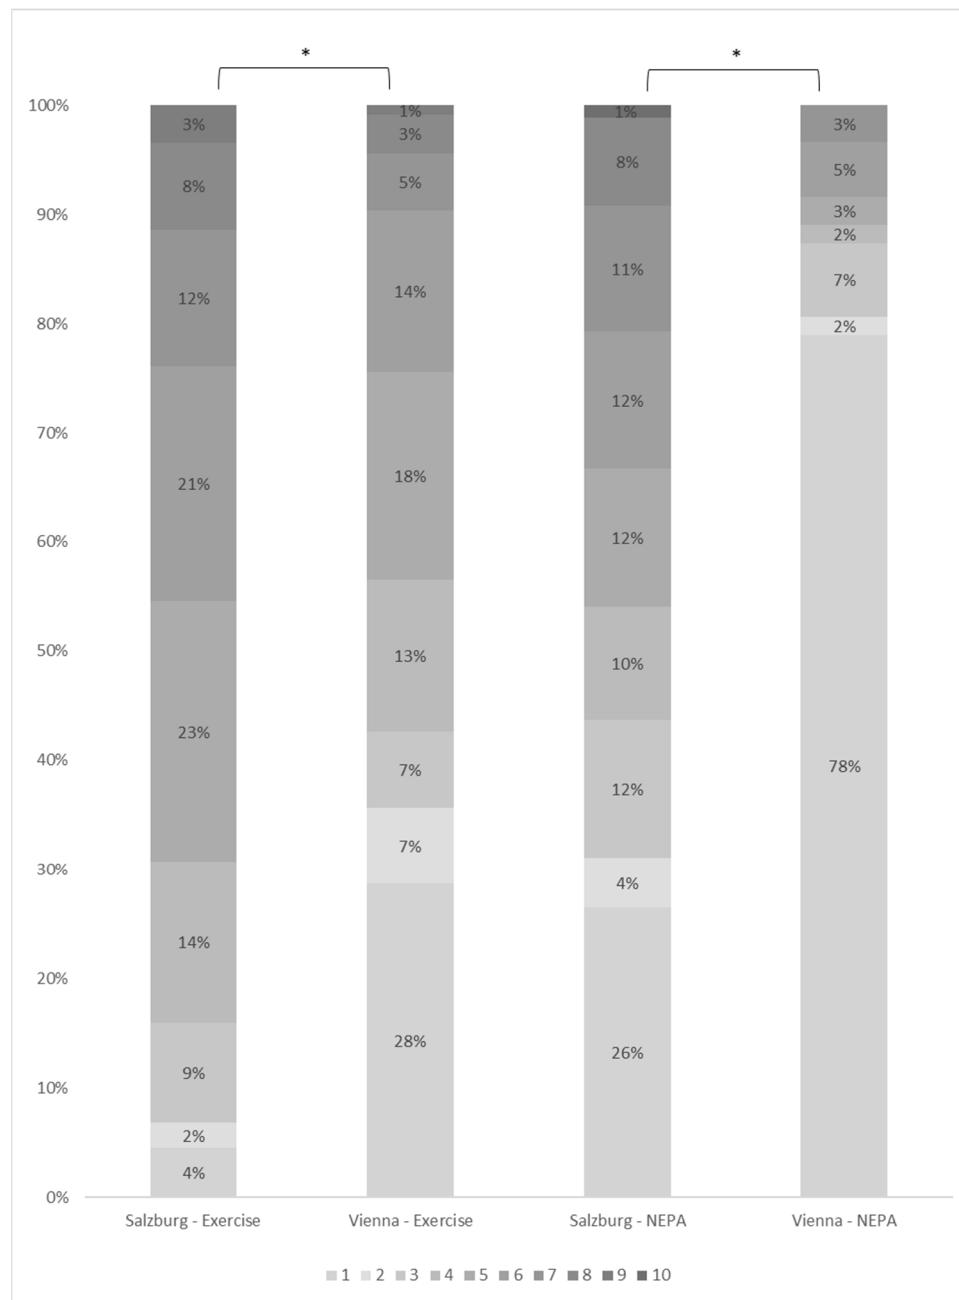

**Figure S2.** Differences in load regarding the intensity of exercise, and NEPA by region. Note. Comparison of answers regarding intensity of an average exercise (= planned and structured physical activity to maintain or improve in physical fitness and/or sport) and NEPA (= non-exercise physical activity) session in percent in terms of subjective exercise intensity via rating of perceived exertion (1 =very light, 2= light, 3 = moderate, 4= somewhat hard, 5-6 = hard, 7-9 very hard, 10 maximal effort). Exercise: Salzburg n=88, Vienna n=115. NEPA: Salzburg n=87, Vienna n=119. \* =  $p < 0.05$ .

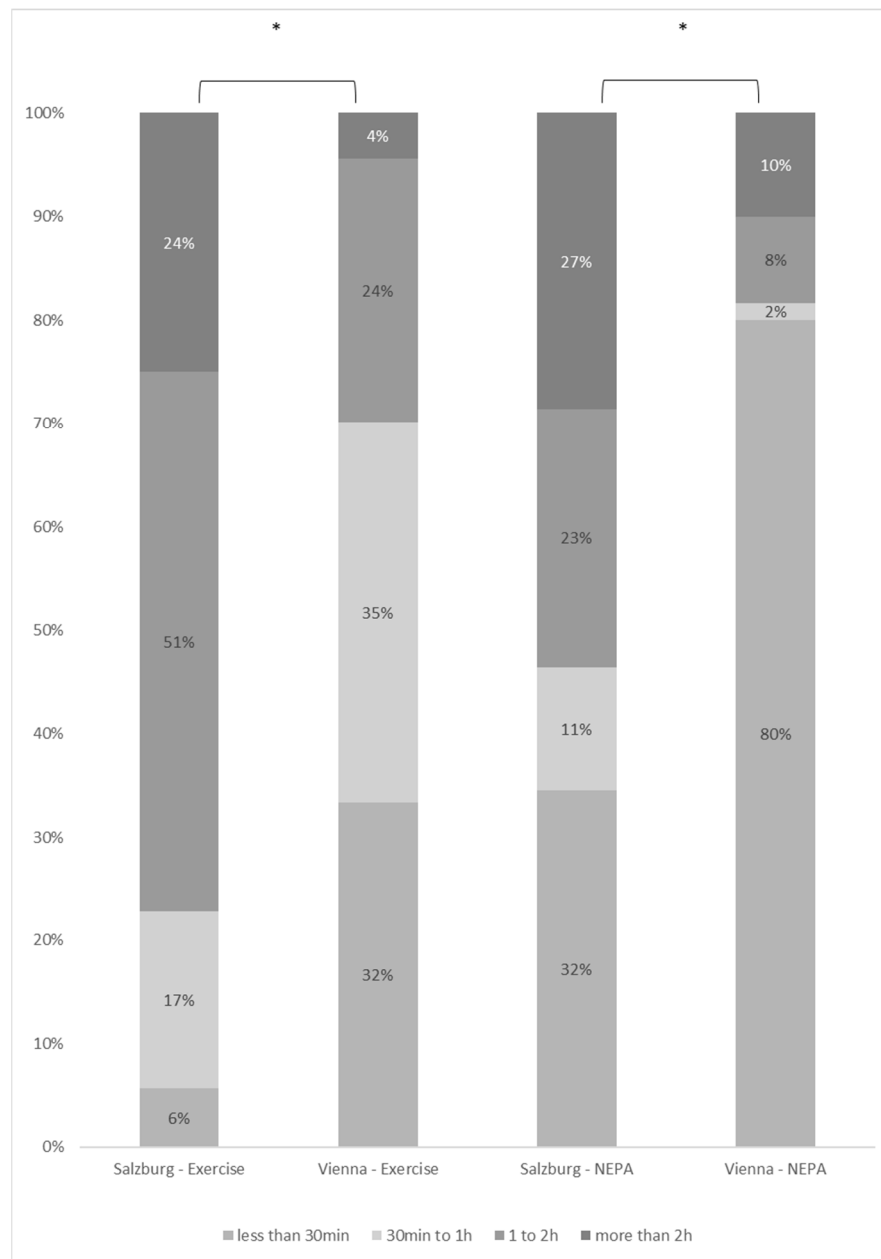

**Figure S3.** Differences in load regarding the duration of exercise and NEPA by region. Note. Comparison of answers regarding average duration (min, h) on days of an exercise (= planned and structured physical activity to maintain or improve in physical fitness and/or sport) and NEPA (= non-exercise physical activity) session. Exercise: Salzburg n: 88, Vienna n: 114. NEPA: Salzburg n=84, Vienna n=120. \* =  $p < 0.05$ .

Table S1. correlation analysis

|                         |                   | Self-<br>Reported<br>Health | HEPA                   | Grip                   | UPS                    | 5CR                     | 30CR                   | Shoulder<br>F          | HipExtF                | HipAbdF                | BicF                   | Shoulder<br>Mob        | LegMob                 | Exercise<br>Frequenc<br>y | Exercise<br>Intensity  | Exercise<br>Duration   | NEPA<br>Frequenc<br>y  | NEPA<br>Intensity      | NEPA<br>Duration |
|-------------------------|-------------------|-----------------------------|------------------------|------------------------|------------------------|-------------------------|------------------------|------------------------|------------------------|------------------------|------------------------|------------------------|------------------------|---------------------------|------------------------|------------------------|------------------------|------------------------|------------------|
| Self-Reported<br>Health | $r_s$<br>$p$<br>N |                             |                        |                        |                        |                         |                        |                        |                        |                        |                        |                        |                        |                           |                        |                        |                        |                        |                  |
| HEPA                    | $r_s$<br>$p$<br>N | ,202**<br>0,003<br>209      |                        |                        |                        |                         |                        |                        |                        |                        |                        |                        |                        |                           |                        |                        |                        |                        |                  |
| Grip                    | $r_s$<br>$p$<br>N | ,136*<br>0,049<br>209       | ,168*<br>0,015<br>209  |                        |                        |                         |                        |                        |                        |                        |                        |                        |                        |                           |                        |                        |                        |                        |                  |
| UPS                     | $r_s$<br>$p$<br>N | ,243**<br>0,000<br>209      | ,206**<br>0,003<br>209 | -0,001<br>0,985<br>210 | -                      |                         |                        |                        |                        |                        |                        |                        |                        |                           |                        |                        |                        |                        |                  |
| 5CR                     | $r_s$<br>$p$<br>N | -,146*<br>0,035<br>209      | -0,132<br>0,057<br>209 | -0,071<br>0,304<br>210 | -0,107<br>0,123<br>210 | -                       |                        |                        |                        |                        |                        |                        |                        |                           |                        |                        |                        |                        |                  |
| 30CR                    | $r_s$<br>$p$<br>N | ,163*<br>0,019<br>209       | ,150*<br>0,030<br>209  | 0,080<br>0,249<br>210  | 0,135<br>0,051<br>210  | -,771**<br>0,000<br>210 | -                      |                        |                        |                        |                        |                        |                        |                           |                        |                        |                        |                        |                  |
| ShoulderF               | $r_s$<br>$p$<br>N | 0,013<br>0,850<br>209       | ,177*<br>0,010<br>209  | ,679**<br>0,000<br>210 | 0,077<br>0,265<br>210  | -,187**<br>0,006<br>210 | ,241**<br>0,000<br>210 | -                      |                        |                        |                        |                        |                        |                           |                        |                        |                        |                        |                  |
| HipExtF                 | $r_s$<br>$p$<br>N | ,204**<br>0,003<br>209      | ,239**<br>0,000<br>209 | ,528**<br>0,000<br>210 | ,381**<br>0,000<br>210 | -,155*<br>0,024<br>210  | ,234**<br>0,001<br>210 | ,597**<br>0,000<br>210 | -                      |                        |                        |                        |                        |                           |                        |                        |                        |                        |                  |
| HipAbdF                 | $r_s$<br>$p$<br>N | 0,096<br>0,168<br>209       | ,169*<br>0,015<br>209  | ,469**<br>0,000<br>210 | ,155*<br>0,025<br>210  | -,212**<br>0,002<br>210 | ,258**<br>0,000<br>210 | ,570**<br>0,000<br>210 | ,649**<br>0,000<br>210 | -                      |                        |                        |                        |                           |                        |                        |                        |                        |                  |
| BicF                    | $r_s$<br>$p$<br>N | 0,091<br>0,190<br>209       | ,163*<br>0,018<br>209  | ,722**<br>0,000<br>210 | ,142*<br>0,039<br>210  | -0,108<br>0,120<br>210  | ,186**<br>0,007<br>210 | ,763**<br>0,000<br>210 | ,710**<br>0,000<br>210 | ,609**<br>0,000<br>210 | -                      |                        |                        |                           |                        |                        |                        |                        |                  |
| ShoulderMob             | $r_s$<br>$p$<br>N | 0,066<br>0,340<br>209       | 0,022<br>0,749<br>209  | -,171*<br>0,013<br>210 | 0,069<br>0,321<br>210  | -0,087<br>0,209<br>210  | ,156*<br>0,024<br>210  | -0,115<br>0,095<br>210 | -0,031<br>0,657<br>210 | 0,043<br>0,533<br>210  | -0,122<br>0,079<br>210 | -                      |                        |                           |                        |                        |                        |                        |                  |
| LegMob                  | $r_s$<br>$p$<br>N | 0,019<br>0,786<br>209       | 0,101<br>0,146<br>209  | -0,054<br>0,439<br>210 | ,173*<br>0,012<br>210  | -0,122<br>0,077<br>210  | 0,076<br>0,272<br>210  | 0,099<br>0,151<br>210  | ,202**<br>0,003<br>210 | ,222**<br>0,001<br>210 | 0,057<br>0,410<br>210  | ,205**<br>0,003<br>210 | -                      |                           |                        |                        |                        |                        |                  |
| Exercise<br>Frequency   | $r_s$<br>$p$<br>N | ,227**<br>0,001<br>209      | ,556**<br>0,000<br>209 | ,174*<br>0,012<br>210  | ,208**<br>0,002<br>210 | -0,069<br>0,322<br>210  | 0,040<br>0,567<br>210  | ,175*<br>0,011<br>210  | ,310**<br>0,000<br>210 | ,172*<br>0,012<br>210  | ,200**<br>0,004<br>210 | -0,015<br>0,830<br>210 | ,229**<br>0,001<br>210 | -                         |                        |                        |                        |                        |                  |
| Exercise<br>Intensity   | $r_s$<br>$p$<br>N | ,141*<br>0,045<br>202       | ,425**<br>0,000<br>202 | ,196**<br>0,005<br>203 | 0,128<br>0,069<br>203  | -,158*<br>0,025<br>203  | 0,090<br>0,201<br>203  | ,197**<br>0,005<br>203 | ,356**<br>0,000<br>203 | ,249**<br>0,000<br>203 | ,222**<br>0,001<br>203 | 0,015<br>0,828<br>203  | ,213**<br>0,002<br>203 | ,530**<br>0,000<br>203    | -                      |                        |                        |                        |                  |
| Exercise<br>Duration    | $r_s$<br>$p$<br>N | ,177**<br>0,012<br>201      | ,345**<br>0,000<br>201 | ,220**<br>0,002<br>202 | ,264**<br>0,000<br>202 | -,147*<br>0,037<br>202  | ,153*<br>0,030<br>202  | ,253**<br>0,000<br>202 | ,411**<br>0,000<br>202 | ,331**<br>0,000<br>202 | ,270**<br>0,000<br>202 | -0,005<br>0,941<br>202 | ,261**<br>0,000<br>202 | ,467**<br>0,000<br>202    | ,503**<br>0,000<br>200 | -                      |                        |                        |                  |
| NEPA<br>Frequency       | $r_s$<br>$p$<br>N | -0,041<br>0,558<br>209      | 0,112<br>0,105<br>209  | -0,086<br>0,216<br>210 | 0,075<br>0,278<br>210  | -0,022<br>0,754<br>210  | -0,109<br>0,115<br>210 | 0,034<br>0,621<br>210  | ,164*<br>0,017<br>210  | 0,067<br>0,336<br>210  | 0,022<br>0,751<br>210  | -0,073<br>0,294<br>210 | ,234**<br>0,001<br>210 | ,191**<br>0,005<br>210    | ,246**<br>0,000<br>203 | ,211**<br>0,003<br>202 | -                      |                        |                  |
| NEPA<br>Intensity       | $r_s$<br>$p$<br>N | -0,096<br>0,171<br>205      | ,163*<br>0,019<br>205  | -0,061<br>0,380<br>206 | 0,128<br>0,068<br>206  | 0,047<br>0,506<br>206   | -,140*<br>0,044<br>206 | 0,070<br>0,316<br>206  | ,188**<br>0,007<br>206 | 0,070<br>0,314<br>206  | 0,026<br>0,714<br>206  | -0,079<br>0,261<br>206 | ,218**<br>0,002<br>206 | ,246**<br>0,000<br>206    | ,342**<br>0,000<br>201 | ,266**<br>0,000<br>199 | ,845**<br>0,000<br>206 | -                      |                  |
| NEPA<br>Duration        | $r_s$<br>$p$<br>N | -0,026<br>0,712<br>203      | ,150*<br>0,033<br>203  | -0,012<br>0,867<br>204 | 0,120<br>0,087<br>204  | 0,013<br>0,853<br>204   | -0,043<br>0,538<br>204 | 0,040<br>0,573<br>204  | ,161*<br>0,021<br>204  | 0,044<br>0,531<br>204  | 0,034<br>0,633<br>204  | -0,035<br>0,620<br>204 | ,206**<br>0,003<br>204 | ,211**<br>0,002<br>204    | ,254**<br>0,000<br>198 | ,284**<br>0,000<br>197 | ,839**<br>0,000<br>204 | ,783**<br>0,000<br>203 | -                |

Note: \*. Correlation is significant at the 0.05 level (2-tailed). \*\*. Correlation is significant at the 0.01 level (2-tailed). 30CR, 30-second Chair-Rise-Test; UPS, Uni-Pedal-Stance Test; Grip, Handgrip-Strength Test; ShoulderF, isometric strength testing for shoulder abduction; HipExtF, isometric strength testing for prone hip extension; HipAbdF, isometric strength testing for side-lying hip abduction; BicF, isometric strength testing for elbow flexion; ShoulderMob, range of motion testing for shoulder flexion expressed in degrees; LegMob, range of motion testing for hip flexion in lying supine position expressed in degrees; exercise (= planned and structured physical activity to maintain or improve in physical fitness and/or sport); NEPA (= non-exercise physical activity); frequency = sessions per week, intensity = intensity per session; duration = duration per session, for both exercise and NEPA.

Table S2. region-specific correlation analysis

|                      |                      | Self-Reported Health | HEPA   | Grip   | UPS    | 5CR     | 30CR    | Shoulder F | HipExtF | HipAbdF | BicF   | Shoulder Mob | LegMob | Exercise Frequency | Exercise Intensity | Exercise Duration | NEPA Frequency | NEPA Intensity | NEPA Duration |
|----------------------|----------------------|----------------------|--------|--------|--------|---------|---------|------------|---------|---------|--------|--------------|--------|--------------------|--------------------|-------------------|----------------|----------------|---------------|
| Self-Reported Health | <i>r<sub>s</sub></i> |                      | ,212*  | 0,082  | 0,114  | -0,137  | ,213*   | 0,064      | ,257*   | 0,197   | 0,144  | 0,044        | 0,107  | 0,208              | 0,091              | 0,121             | -0,191         | -,219*         | -0,168        |
|                      | <i>p</i>             |                      | 0,046  | 0,443  | 0,288  | 0,200   | 0,045   | 0,550      | 0,015   | 0,065   | 0,177  | 0,683        | 0,320  | 0,050              | 0,403              | 0,265             | 0,074          | 0,043          | 0,129         |
|                      | <i>N</i>             |                      | 89     | 89     | 89     | 89      | 89      | 89         | 89      | 89      | 89     | 89           | 89     | 89                 | 87                 | 87                | 89             | 86             | 83            |
| HEPA                 | <i>r<sub>s</sub></i> | ,202*                |        | ,237*  | 0,113  | -0,142  | 0,201   | ,304**     | 0,155   | 0,198   | 0,159  | 0,112        | 0,017  | ,516**             | ,342**             | 0,106             | -,270*         | -0,091         | -0,115        |
|                      | <i>p</i>             | 0,027                |        | 0,026  | 0,293  | 0,185   | 0,059   | 0,004      | 0,147   | 0,062   | 0,137  | 0,294        | 0,872  | 0,000              | 0,001              | 0,328             | 0,010          | 0,404          | 0,299         |
|                      | <i>N</i>             | 120                  |        | 89     | 89     | 89      | 89      | 89         | 89      | 89      | 89     | 89           | 89     | 89                 | 87                 | 87                | 89             | 86             | 83            |
| Grip                 | <i>r<sub>s</sub></i> | 0,160                | 0,107  |        | -0,006 | -0,125  | ,249*   | ,727**     | ,613**  | ,623**  | ,725** | -0,115       | -0,062 | 0,093              | 0,143              | 0,189             | -0,170         | -0,123         | 0,016         |
|                      | <i>p</i>             | 0,081                | 0,247  |        | 0,952  | 0,242   | 0,018   | 0,000      | 0,000   | 0,000   | 0,000  | 0,279        | 0,560  | 0,384              | 0,184              | 0,077             | 0,109          | 0,255          | 0,887         |
|                      | <i>N</i>             | 120                  | 120    |        | 90     | 90      | 90      | 90         | 90      | 90      | 90     | 90           | 90     | 90                 | 88                 | 88                | 90             | 87             | 84            |
| UPS                  | <i>r<sub>s</sub></i> | ,337**               | 0,164  | -0,039 |        | -0,035  | -0,007  | -0,019     | 0,206   | -0,064  | 0,015  | 0,044        | -0,086 | 0,085              | -0,070             | 0,085             | -0,121         | 0,016          | 0,073         |
|                      | <i>p</i>             | 0,000                | 0,074  | 0,673  |        | 0,745   | 0,944   | 0,860      | 0,052   | 0,550   | 0,888  | 0,681        | 0,421  | 0,427              | 0,518              | 0,429             | 0,257          | 0,883          | 0,508         |
|                      | <i>N</i>             | 120                  | 120    | 120    |        | 90      | 90      | 90         | 90      | 90      | 90     | 90           | 90     | 90                 | 88                 | 88                | 90             | 87             | 84            |
| 5CR                  | <i>r<sub>s</sub></i> | -0,149               | -0,141 | -0,029 | -,186* |         | -,821** | -,294**    | -0,101  | -,255*  | -0,043 | -0,170       | -0,145 | -0,086             | -0,152             | -0,096            | -0,117         | 0,009          | 0,038         |
|                      | <i>p</i>             | 0,103                | 0,124  | 0,755  | 0,042  |         | 0,000   | 0,005      | 0,342   | 0,015   | 0,685  | 0,109        | 0,172  | 0,419              | 0,158              | 0,376             | 0,272          | 0,934          | 0,732         |
|                      | <i>N</i>             | 120                  | 120    | 120    | 120    |         | 90      | 90         | 90      | 90      | 90     | 90           | 90     | 90                 | 88                 | 88                | 90             | 87             | 84            |
| 30CR                 | <i>r<sub>s</sub></i> | 0,119                | 0,155  | -0,019 | ,286** | -,725** |         | ,443**     | ,301**  | ,378**  | ,265*  | 0,173        | 0,168  | 0,099              | 0,096              | ,238*             | -0,036         | -0,094         | 0,011         |
|                      | <i>p</i>             | 0,195                | 0,091  | 0,835  | 0,002  | 0,000   |         | 0,000      | 0,004   | 0,000   | 0,012  | 0,103        | 0,114  | 0,355              | 0,375              | 0,026             | 0,737          | 0,388          | 0,921         |
|                      | <i>N</i>             | 120                  | 120    | 120    | 120    | 120     |         | 90         | 90      | 90      | 90     | 90           | 90     | 90                 | 88                 | 88                | 90             | 87             | 84            |
| ShoulderF            | <i>r<sub>s</sub></i> | -0,020               | -0,020 | ,661** | 0,024  | -0,167  | ,221*   |            | ,565**  | ,659**  | ,691** | -0,027       | -0,040 | 0,147              | 0,121              | 0,176             | -0,089         | -0,028         | -0,028        |
|                      | <i>p</i>             | 0,824                | 0,824  | 0,000  | 0,791  | 0,069   | 0,015   |            | 0,000   | 0,000   | 0,000  | 0,802        | 0,705  | 0,166              | 0,262              | 0,101             | 0,404          | 0,797          | 0,803         |
|                      | <i>N</i>             | 120                  | 120    | 120    | 120    | 120     | 120     |            | 90      | 90      | 90     | 90           | 90     | 90                 | 88                 | 88                | 90             | 87             | 84            |
| HipExtF              | <i>r<sub>s</sub></i> | ,210*                | 0,081  | ,498** | ,344** | -,279** | ,373**  | ,546**     |         | ,535**  | ,714** | 0,125        | -0,067 | 0,098              | 0,145              | ,287**            | -0,115         | -0,036         | -0,007        |
|                      | <i>p</i>             | 0,021                | 0,379  | 0,000  | 0,000  | 0,002   | 0,000   | 0,000      |         | 0,000   | 0,000  | 0,240        | 0,531  | 0,358              | 0,177              | 0,007             | 0,281          | 0,741          | 0,948         |
|                      | <i>N</i>             | 120                  | 120    | 120    | 120    | 120     | 120     | 120        |         | 90      | 90     | 90           | 90     | 90                 | 88                 | 88                | 90             | 87             | 84            |
| HipAbdF              | <i>r<sub>s</sub></i> | 0,033                | 0,017  | ,371** | ,184*  | -,224*  | ,257**  | ,491**     | ,709**  |         | ,613** | 0,126        | 0,018  | 0,049              | 0,144              | 0,171             | -0,094         | -0,100         | -0,114        |
|                      | <i>p</i>             | 0,720                | 0,852  | 0,000  | 0,044  | 0,014   | 0,005   | 0,000      | 0,000   |         | 0,000  | 0,238        | 0,864  | 0,645              | 0,179              | 0,112             | 0,380          | 0,355          | 0,303         |
|                      | <i>N</i>             | 120                  | 120    | 120    | 120    | 120     | 120     | 120        | 120     |         | 90     | 90           | 90     | 90                 | 88                 | 88                | 90             | 87             | 84            |
| BicF                 | <i>r<sub>s</sub></i> | 0,057                | 0,048  | ,734** | 0,118  | -,197*  | ,205*   | ,765**     | ,684**  | ,582**  |        | -0,063       | -0,067 | 0,139              | 0,170              | ,224*             | -0,189         | -0,152         | -0,138        |
|                      | <i>p</i>             | 0,533                | 0,604  | 0,000  | 0,199  | 0,031   | 0,025   | 0,000      | 0,000   | 0,000   |        | 0,554        | 0,529  | 0,193              | 0,114              | 0,036             | 0,074          | 0,161          | 0,210         |
|                      | <i>N</i>             | 120                  | 120    | 120    | 120    | 120     | 120     | 120        | 120     | 120     |        | 90           | 90     | 90                 | 88                 | 88                | 90             | 87             | 84            |
| ShoulderMob          | <i>r<sub>s</sub></i> | 0,084                | 0,059  | -0,143 | ,181*  | -0,026  | 0,086   | -0,026     | 0,068   | 0,092   | -0,049 |              | ,403** | 0,050              | 0,024              | 0,032             | -0,138         | -0,103         | 0,003         |
|                      | <i>p</i>             | 0,359                | 0,525  | 0,120  | 0,048  | 0,776   | 0,349   | 0,782      | 0,457   | 0,320   | 0,595  |              | 0,000  | 0,640              | 0,822              | 0,768             | 0,196          | 0,342          | 0,976         |
|                      | <i>N</i>             | 120                  | 120    | 120    | 120    | 120     | 120     | 120        | 120     | 120     | 120    |              | 90     | 90                 | 88                 | 88                | 90             | 87             | 84            |
| LegMob               | <i>r<sub>s</sub></i> | -0,064               | -0,069 | -0,109 | ,191*  | -0,169  | 0,126   | -0,011     | 0,084   | ,190*   | -0,040 | ,281**       |        | 0,078              | 0,035              | -0,028            | 0,013          | -0,067         | 0,039         |
|                      | <i>p</i>             | 0,485                | 0,452  | 0,235  | 0,037  | 0,065   | 0,169   | 0,904      | 0,362   | 0,038   | 0,668  | 0,002        |        | 0,467              | 0,750              | 0,796             | 0,902          | 0,538          | 0,723         |
|                      | <i>N</i>             | 120                  | 120    | 120    | 120    | 120     | 120     | 120        | 120     | 120     | 120    | 120          |        | 90                 | 88                 | 88                | 90             | 87             | 84            |
| Exercise Frequency   | <i>r<sub>s</sub></i> | ,249**               | ,481** | 0,177  | 0,150  | -0,100  | 0,081   | 0,034      | ,201*   | 0,097   | 0,099  | 0,083        | 0,077  |                    | 0,183              | 0,125             | -0,181         | -0,046         | -0,027        |
|                      | <i>p</i>             | 0,006                | 0,000  | 0,053  | 0,102  | 0,278   | 0,381   | 0,710      | 0,028   | 0,294   | 0,284  | 0,367        | 0,405  |                    | 0,088              | 0,247             | 0,088          | 0,673          | 0,807         |
|                      | <i>N</i>             | 120                  | 120    | 120    | 120    | 120     | 120     | 120        | 120     | 120     | 120    | 120          | 120    |                    | 88                 | 88                | 90             | 87             | 84            |
| Exercise Intensity   | <i>r<sub>s</sub></i> | ,197*                | ,375** | ,190*  | 0,131  | -,217*  | 0,169   | 0,112      | ,302**  | ,209*   | 0,137  | 0,151        | 0,130  | ,685**             |                    | 0,141             | -0,028         | 0,107          | -0,001        |
|                      | <i>p</i>             | 0,034                | 0,000  | 0,042  | 0,162  | 0,020   | 0,070   | 0,232      | 0,001   | 0,025   | 0,143  | 0,108        | 0,165  | 0,000              |                    | 0,189             | 0,794          | 0,327          | 0,994         |
|                      | <i>N</i>             | 115                  | 115    | 115    | 115    | 115     | 115     | 115        | 115     | 115     | 115    | 115          | 115    | 115                |                    | 88                | 88             | 86             | 83            |
| Exercise Duration    | <i>r<sub>s</sub></i> | ,254**               | ,317** | 0,183  | ,204*  | -,278** | ,241**  | 0,079      | ,214*   | ,290**  | 0,116  | 0,156        | ,194*  | ,554**             | ,657**             |                   | -,252*         | -0,194         | -0,050        |
|                      | <i>p</i>             | 0,006                | 0,001  | 0,051  | 0,029  | 0,003   | 0,010   | 0,403      | 0,022   | 0,002   | 0,220  | 0,097        | 0,039  | 0,000              | 0,000              |                   | 0,018          | 0,074          | 0,653         |
|                      | <i>N</i>             | 114                  | 114    | 114    | 114    | 114     | 114     | 114        | 114     | 114     | 114    | 114          | 114    | 114                | 112                |                   | 88             | 86             | 83            |
| NEPA Frequency       | <i>r<sub>s</sub></i> | 0,060                | 0,160  | -0,154 | -0,027 | -0,037  | -0,034  | -,181*     | -0,066  | -0,031  | -0,088 | 0,170        | 0,071  | 0,104              | 0,175              | 0,139             |                | ,527**         | ,557**        |
|                      | <i>p</i>             | 0,513                | 0,081  | 0,092  | 0,766  | 0,691   | 0,715   | 0,048      | 0,473   | 0,739   | 0,337  | 0,063        | 0,442  | 0,257              | 0,061              | 0,140             |                | 0,000          | 0,000         |
|                      | <i>N</i>             | 120                  | 120    | 120    | 120    | 120     | 120     | 120        | 120     | 120     | 120    | 120          | 120    | 120                | 115                | 114               |                | 87             | 84            |
|                      | <i>r<sub>s</sub></i> | 0,042                | 0,129  | -0,129 | -0,029 | 0,019   | -0,071  | -0,150     | -0,096  | -0,061  | -0,140 | 0,150        | 0,101  | 0,171              | ,245**             | 0,174             | ,899**         |                | ,514**        |

|           |                      |       |       |        |        |        |       |        |        |        |        |       |       |       |       |       |        |        |
|-----------|----------------------|-------|-------|--------|--------|--------|-------|--------|--------|--------|--------|-------|-------|-------|-------|-------|--------|--------|
| NEPA      | <i>p</i>             | 0,648 | 0,163 | 0,162  | 0,757  | 0,835  | 0,444 | 0,104  | 0,297  | 0,510  | 0,130  | 0,103 | 0,274 | 0,062 | 0,008 | 0,066 | 0,000  | 0,000  |
| Intensity | N                    | 119   | 119   | 119    | 119    | 119    | 119   | 119    | 119    | 119    | 119    | 119   | 119   | 119   | 115   | 113   | 119    | 84     |
| NEPA      | <i>r<sub>s</sub></i> | 0,083 | 0,151 | -0,123 | -0,031 | -0,079 | 0,018 | -0,149 | -0,065 | -0,028 | -0,056 | 0,128 | 0,060 | 0,125 | ,215* | ,214* | ,936** | ,850** |
| Duration  | <i>p</i>             | 0,368 | 0,101 | 0,182  | 0,737  | 0,391  | 0,841 | 0,104  | 0,478  | 0,764  | 0,547  | 0,164 | 0,517 | 0,175 | 0,021 | 0,022 | 0,000  | 0,000  |
|           | N                    | 120   | 120   | 120    | 120    | 120    | 120   | 120    | 120    | 120    | 120    | 120   | 120   | 120   | 115   | 114   | 120    | 119    |

Note: The results for the Salzburg sample are shown above the diagonal (marked in green). The results for the Vienna sample are shown below the diagonal (marked in blue). \*. Correlation is significant at the 0.05 level (2-tailed). \*\*. Correlation is significant at the 0.01 level (2-tailed). 30CR, 30-second Chair-Rise-Test; UPS, Uni-Pedal-Stance Test; Grip, Handgrip-Strength Test; ShoulderF, isometric strength testing for shoulder abduction; HipExtF, isometric strength testing for prone hip extension; HipAbdF, isometric strength testing for side-lying hip abduction; BicF, isometric strength testing for elbow flexion; ShoulderMob, range of motion testing for shoulder flexion expressed in degrees; LegMob, range of motion testing for hip flexion in lying supine position expressed in degrees; exercise (= planned and structured physical activity to maintain or improve in physical fitness and/or sport); NEPA (= non-exercise physical activity); frequency = sessions per week, intensity = intensity per session; duration = duration per session, for both exercise and NEPA.
